# Supplementary material for: Biomimetic Mineralization of Tannic Acid-Supplemented HEMA/SBMA Nanocomposite Hydrogels
Source: MDPI journal article supplement (doi:10.3390/polym13111697), 2021-05-22

**Table S1** Copolymerization formulations for the hybrid HEMA/SBMA hydrogels with different contents of monomer. For the preparation of the hybrid HEMA/SBMA hydrogels, HEMA, SBMA and EGDMA were dissolved in tris buffer solution (pH = 8.5, 10 mM) followed by addition of 5 mg APS and 5  $\mu$ L TEMED to initiate polymerization. Each reaction solution was poured into two PP plates separated by a 2 mm thick spacer. After 24 h reaction, the copolymers were immersed in DI water several times to allow for hydration and the removal of residual unreacted reagents.

| Name  | HEMA ( $\mu$ L) | SBMA (mg) | EGDMA ( $\mu$ L) | Tris ( $\mu$ L) |
|-------|-----------------|-----------|------------------|-----------------|
| SB0   | 600             | 0         | 30               | 400             |
| SB20  | 480             | 120       | 30               | 400             |
| SB40  | 360             | 240       | 30               | 400             |
| SB50  | 300             | 300       | 30               | 400             |
| SB60  | 240             | 360       | 30               | 400             |
| SB80  | 120             | 480       | 30               | 400             |
| SB100 | 0               | 600       | 30               | 400             |

**Table S2** Copolymerization formulations for the hybrid HEMA/SBMA nanocomposite hydrogels with different contents of clay. For the preparation of the hybrid HEMA/SBMA nanocomposite hydrogels, HEMA, SBMA and EGDMA were dissolved in one-third of tris buffer solution (pH = 8.5, 10 mM), while Laponite XLG were dissolved in two-thirds of tris buffer solution. After the two solutions were completely dissolved, the two solutions were mixed, and then 5 mg APS and 5  $\mu$ L TEMED were added to initiate polymerization. Each reaction solution was poured into two PP plates separated by a 2 mm thick spacer. After 24 h reaction, the copolymers were immersed in DI water several times to allow for hydration and the removal of residual unreacted reagents.

| Name   | HEMA ( $\mu$ L) | SBMA (mg) | EGDMA ( $\mu$ L) | Clay (mg) | Tris ( $\mu$ L) |
|--------|-----------------|-----------|------------------|-----------|-----------------|
| Clay0  | 300             | 300       | 30               | 0         | 400             |
| Clay10 | 300             | 300       | 30               | 10        | 400             |
| Clay20 | 300             | 300       | 30               | 20        | 400             |
| Clay30 | 300             | 300       | 30               | 30        | 400             |

**Table S3** Copolymerization formulations for the TA-supplemented hybrid HEMA/SBMA nanocomposite hydrogels with different contents of TA. For the preparation of the TA-supplemented hybrid HEMA/SBMA nanocomposite hydrogels, HEMA, SBMA, EGDMA and TA were first dissolved in one-third of tris buffer solution, while Laponite XLG was dissolved in two-thirds of tris buffer solution. After the two solutions were completely dissolved, the two solutions were mixed evenly and added 5 mg APS and 5  $\mu$ L TEMED to initiate polymerization. Each reaction solution was poured into two PP plates separated by a 2 mm thick spacer. After 24 h reaction, the copolymers were immersed in DI water several times to allow for hydration and the removal of residual unreacted reagents.

| Name  | HEMA ( $\mu$ L) | SBMA (mg) | EGDMA ( $\mu$ L) | Clay (mg) | TA (mg) | H <sub>2</sub> O ( $\mu$ L) |
|-------|-----------------|-----------|------------------|-----------|---------|-----------------------------|
| TA0   | 300             | 300       | 30               | 30        | 0       | 400                         |
| TA0.5 | 300             | 300       | 30               | 30        | 0.5     | 400                         |
| TA2   | 300             | 300       | 30               | 30        | 2       | 400                         |
| TA10  | 300             | 300       | 30               | 30        | 10      | 400                         |

**Figure S1** Suggested mechanism of the catechol-triggered polymerization of acrylate monomers

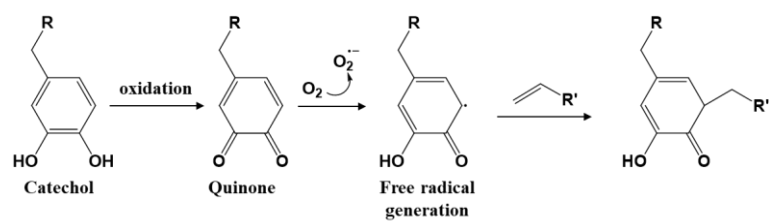

Supplement: s1 [file s1]
